# Supplementary material for: Facile synthesis of Prussian blue @ gold nanocomposite for nonenzymatic detection of hydrogen peroxide
Source: Royal Society of Chemistry journal article supplement (doi:10.1039/c3ra42572j), 2013-01-01
Supplement: c3ra42572j.pdf [file c3ra42572j.pdf]

## Supplementary Information

### **Facile synthesis of Prussian blue @ gold nanocomposite for nonenzymatic detection of hydrogen peroxide**

**Pengjuan Ni<sup>a,b</sup>, Yue Zhang<sup>a,b</sup>, Yujing Sun<sup>a</sup>, Yan Shi<sup>a,b</sup>, Haichao Dai<sup>a,b</sup>, Jingting Hu<sup>a,b</sup>, Zhuang Li<sup>a\*</sup>**

*<sup>a</sup> State Key Laboratory of Electroanalytical Chemistry, Changchun Institute of Applied*

*Chemistry, Changchun 130022, Jilin, P. R. China*

*<sup>b</sup> University of Chinese Academy of Sciences, Beijing 100049, P. R. China*

*Fax: +86 431 85262057; Tel: +86 431 85262057; E-mail: [zli@ciac.jl.cn](mailto:zli@ciac.jl.cn)*

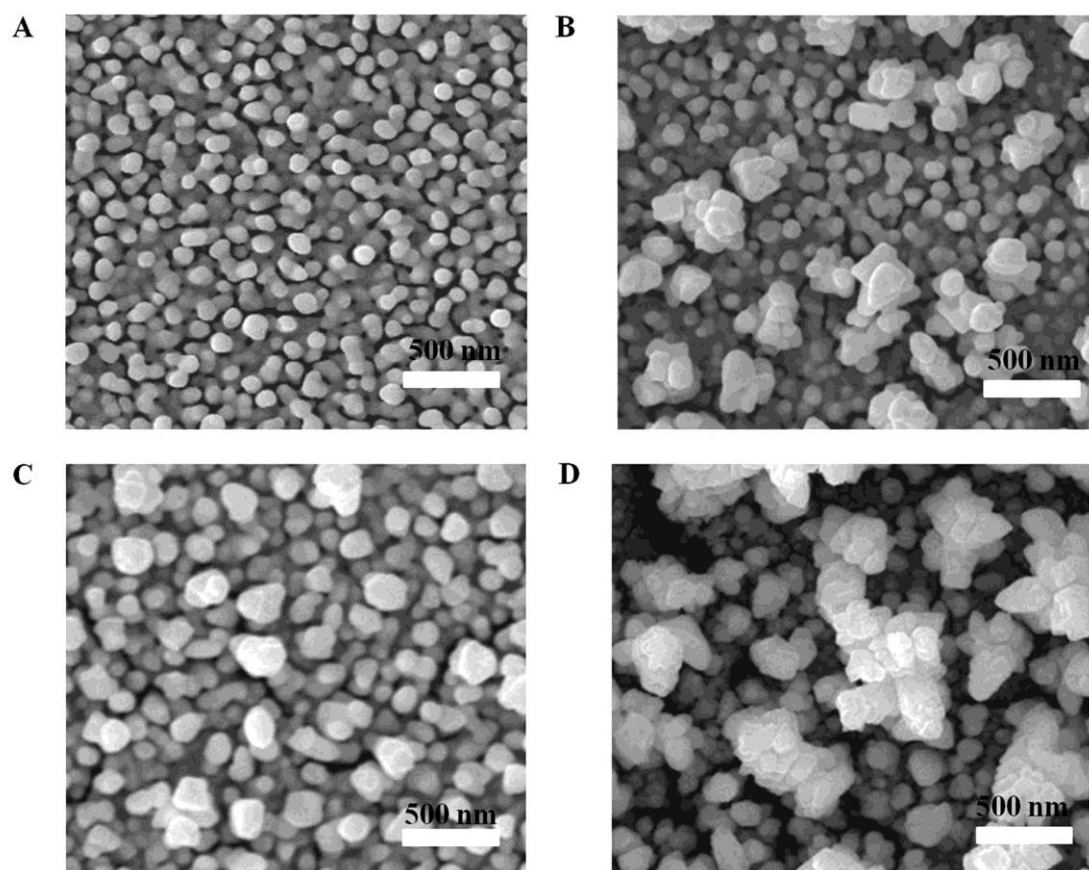

**Figure. S1** The typical SEM images of the obtained Au NPs at different electrodeposition cycles: 5 cycles (A), 10 cycles (B), 15 cycles (C), and 25cycles (D).

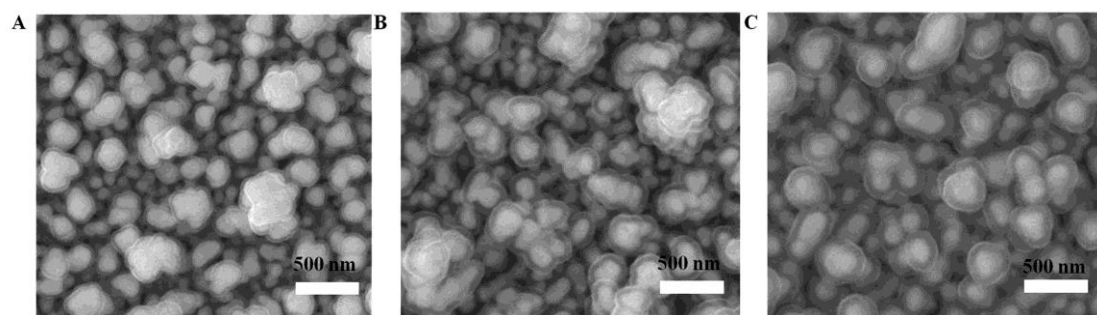

**Figure. S2** The typical SEM images of the obtained PB@Au nanocomposite by immersing the Au NPs obtained at 20 cycles for different time: 45 min (A), 90 min (B), 120 min (C).
